# Supplementary material for: Obesity Characteristics Are Poor Predictors of Genetic Mutations Associated with Obesity
Source: MDPI journal article supplement (doi:10.3390/jcm12196396), 2023-10-07
Supplement: s1 [file s1]

**Table S1.** List of genes included in each category

|                                                                                                                                                                                                                                  |                        |                 |
|----------------------------------------------------------------------------------------------------------------------------------------------------------------------------------------------------------------------------------|------------------------|-----------------|
| <b>Category 1:</b> genetic variants that have been approved for treatment with the MC4R agonist setmelanotide in Europe, as well as those under investigation for setmelanotide efficacy in clinical trials.                     |                        |                 |
| <i>BBS1</i>                                                                                                                                                                                                                      | <i>BBS20 (IFT172)</i>  | <i>PHIP</i>     |
| <i>BBS2</i>                                                                                                                                                                                                                      | <i>BBS21 (CFAP418)</i> | <i>PLXNA1</i>   |
| <i>BBS3 (ARL6)</i>                                                                                                                                                                                                               | <i>BBS22 (IFT74)</i>   | <i>PLXNA2</i>   |
| <i>BBS4</i>                                                                                                                                                                                                                      | <i>CPE</i>             | <i>PLXNA3</i>   |
| <i>BBS5</i>                                                                                                                                                                                                                      | <i>CREBBP</i>          | <i>PLXNA4</i>   |
| <i>BBS6 (MKKS)</i>                                                                                                                                                                                                               | <i>DNMT3A</i>          | <i>POMC</i>     |
| <i>BBS7</i>                                                                                                                                                                                                                      | <i>HTR2C</i>           | <i>RPGRIP1L</i> |
| <i>BBS8 (TTC8)</i>                                                                                                                                                                                                               | <i>ISL1</i>            | <i>SEMA3A</i>   |
| <i>BBS9 (PTHB1)</i>                                                                                                                                                                                                              | <i>KSR2</i>            | <i>SEMA3B</i>   |
| <i>BBS10</i>                                                                                                                                                                                                                     | <i>LEP</i>             | <i>SEMA3C</i>   |
| <i>BBS11 (TRIM32)</i>                                                                                                                                                                                                            | <i>LEPR</i>            | <i>SEMA3D</i>   |
| <i>BBS12</i>                                                                                                                                                                                                                     | <i>MAGEL2</i>          | <i>SEMA3E</i>   |
| <i>BBS13 (MKS1)</i>                                                                                                                                                                                                              | <i>MC3R</i>            | <i>SEMA3F</i>   |
| <i>BBS14 (CEP290)</i>                                                                                                                                                                                                            | <i>MECP2</i>           | <i>SEMA3G</i>   |
| <i>BBS15 (WDPCP)</i>                                                                                                                                                                                                             | <i>MRAP2</i>           | <i>SH2B1</i>    |
| <i>BBS16 (SDCCAG8)</i>                                                                                                                                                                                                           | <i>NCOA1 (SRC1)</i>    | <i>SIM1</i>     |
| <i>BBS17 (LZTFL1)</i>                                                                                                                                                                                                            | <i>NRP1</i>            | <i>TBX3</i>     |
| <i>BBS18 (BBIPI)</i>                                                                                                                                                                                                             | <i>NRP2</i>            | <i>TRPC5</i>    |
| <i>BBS19 (IFT27)</i>                                                                                                                                                                                                             | <i>PCSK1</i>           | <i>TUB</i>      |
| <b>Category 2:</b> genetic variants that may contribute to a diagnosis of genetic obesity but are neither currently indicated for setmelanotide treatment nor under investigation for setmelanotide efficacy in clinical trials. |                        |                 |
| <i>ADCY3</i>                                                                                                                                                                                                                     | <i>GNAS</i>            | <i>PPARG</i>    |
| <i>AFF4</i>                                                                                                                                                                                                                      | <i>INPP5E</i>          | <i>PROK2</i>    |
| <i>ALMS1</i>                                                                                                                                                                                                                     | <i>KIDINS220</i>       | <i>RAB23</i>    |
| <i>BDNF</i>                                                                                                                                                                                                                      | <i>MC4R</i>            | <i>RAI1</i>     |
| <i>CUL4B</i>                                                                                                                                                                                                                     | <i>NR0B2</i>           | <i>RPS6KA3</i>  |
| <i>DYRK1B</i>                                                                                                                                                                                                                    | <i>NTRK2</i>           | <i>UCP3</i>     |
| <i>EP300</i>                                                                                                                                                                                                                     | <i>PCNT</i>            | <i>VPS13B</i>   |
| <i>GNAS</i>                                                                                                                                                                                                                      | <i>PHF6</i>            |                 |

**Table S2.** The genetic panel and risk assessments.

| Gene          | Gene name                                          | Description (HGVS/ISCN)                      | Number detected | Zygosity | Classification (ACMG) |
|---------------|----------------------------------------------------|----------------------------------------------|-----------------|----------|-----------------------|
| <i>AFF4</i>   | ALF transcription elongation factor 4              | NM_014423.4:c.455A>G p.(Asp152Gly)           | 1               | Het.     | VUS                   |
| <i>ALMS1</i>  | ALMS1 centrosome and basal body associated protein | NM_015120.4:c.10775del p.(Thr3592Lysfs*6)    | 1               | Het.     | Pathogenic            |
|               |                                                    | NM_001378454.1:c.3715_3718del p.(Ser1239fs)  | 1               |          | Likely pathogenic     |
| <i>ARMC5</i>  | Armadillo repeat containing 5                      | NM_001105247.2:c.2597 C>T p.(Pro866Leu)      | 1               | Het.     | VUS                   |
| <i>BBS1</i>   | Bardet-Biedl syndrome 1                            | NM_024649.5:c.1169T>G p.(Met390Arg)          | 2               | Het.     | Pathogenic            |
|               |                                                    | NM_024649.5:c.1169T>G p.(Met390Arg)          | 1               |          |                       |
| <i>BBS7</i>   | Bardet-Biedl syndrome 7                            | NM_176824.3:c.1458C>G p.(Tyr486*)            | 2               | Het.     | VUS                   |
|               |                                                    | NM_176824.3:c.1876dup p.(Ile626Asnfs*2)      | 2               |          |                       |
| <i>BBS9</i>   | Bardet-Biedl syndrome 9                            | NM_198428.3:c.(442+1_443-1)_(702+1_703-1)del | 1               | Het.     | Pathogenic            |
| <i>CEP290</i> | Centrosomal protein 290                            | NM_025114.4:c.4966G>T p.(Glu1656*)           | 1               | Het.     | Pathogenic            |
|               |                                                    | C.(102+1_103-1)_(495+1_496-1)del             | 1               |          | VUS                   |
| <i>CREBBP</i> | CREB binding protein                               | NM_004380.3:c.2980G>A p.(Val994Met)          | 1               | Het.     | VUS                   |
|               |                                                    | NM_004380.3:c.4372T>A p.(Leu1458Ile)         | 1               |          |                       |
| <i>CUL4B</i>  | Cullin 4B                                          | NM_003588.3:c.52A>G p.(Thr18Ala)             | 1               | Hem.     | VUS                   |
| <i>DNMT3A</i> | DNA methyltransferase 3 alpha                      | NM_175629.2:c.58G>A p.(Glu20Lys)             | 1               | Het.     | VUS                   |
|               |                                                    | NM_175629.2:c.856-10G>A p.?                  | 1               |          |                       |

|                  |                                                               |                                                        |   |      |     |
|------------------|---------------------------------------------------------------|--------------------------------------------------------|---|------|-----|
| <i>DYRK1B</i>    | Dual specificity tyrosine phosphorylation regulated kinase 1B | NM_004714.3:c.106G>C<br>p.(Ala36Pro)                   | 1 | Het. | VUS |
| <i>EP300</i>     | E1A binding protein P300                                      | NM_001429.4:c.2572A>G<br>p.(Thr858Ala)                 | 1 | Het. | VUS |
|                  |                                                               | NM_001429.4:c.3568A>G<br>p.(Thr1190Ala)                | 1 |      |     |
|                  |                                                               | NM_001429.4:c.902A>C<br>p.(Asn301Thr)                  | 1 |      |     |
|                  |                                                               | NM_001429.4:c.952C>G<br>p.(Pro318Ala)                  | 1 |      |     |
| <i>KIDINS220</i> | Kinase D interacting substrate 220                            | NM_020738.4:c.4925G>A<br>p.(Arg1642Gln)                | 1 | Het. | VUS |
|                  |                                                               | NM_020738.4:c.3617T>C<br>p.(Leu1206Ser)                | 1 |      |     |
|                  |                                                               | NM_020738.4:c.(?_1-1)<br>_108+1_109-1)del              | 1 |      |     |
| <i>MAGEL2</i>    | MAGE family member L2                                         | NM_019066.5:c.2635C>T<br>p.(Pro879Ser)                 | 1 | Het. | VUS |
|                  |                                                               | NM_019066.5:c.1375C>T<br>p.(Arg459Cys)                 | 1 |      |     |
|                  |                                                               | NM_019066.5:c.2329C>A<br>p.(Pro777Thr)                 | 1 |      |     |
|                  |                                                               | NM_019066.5:c.1586_160<br>6del<br>p.(Ala529_Gln535del) | 1 |      |     |
| <i>MC3R</i>      | Melanocortin-3 receptor                                       | NM_019888.3:c.452G>A<br>p.(Arg151His)                  | 1 | Het. | VUS |
|                  |                                                               | NM_019888.3:c.770C>A<br>p.(Pro257His)                  | 1 |      |     |
| <i>MC4R</i>      | Melanocortin-4 receptor                                       | NM_005912.3:c.598A>G<br>p.(Met200Val)                  | 1 | Het. | VUS |
|                  |                                                               | NM_005912.3:c.89C>T<br>p.(Ser30Phe)                    | 1 |      |     |
| <i>MECP2</i>     | Methyl CpG binding protein 2                                  | NM_004992.3:c.605C>G<br>p.(Ala202Gly)                  | 1 | Het. | VUS |
|                  |                                                               | NM_004992.3:c.1102C>T<br>p.(His368Tyr)                 | 1 | Hem. |     |

|              |                                                |                                            |    |      |                   |
|--------------|------------------------------------------------|--------------------------------------------|----|------|-------------------|
| <i>MRAP2</i> | Melanocortin 2 receptor accessory protein 2    | NM_138409.4:c.389A>G p.(Lys130Arg)         | 1  | Het. | VUS               |
| <i>NCOA1</i> | Nuclear receptor coactivator 1                 | NM_003743.5:c.2365A>G p.(Thr789Ala)        | 1  | Het. | VUS               |
| <i>NRPI</i>  | Neuropilin 1                                   | NM_003873.7:c.259G>A p.(Val87Met)          | 1  | Het. | VUS               |
| <i>NRP2</i>  | Neuropilin 2                                   | NM_201266.2:c.2173G>C p.(Gly725Arg)        | 1  | Het. | VUS               |
| <i>NTRK2</i> | Neurotrophic receptor tyrosine kinase 2        | C.(2172+1_2173-1)_(*1_?)dup                | 1  | Het. | VUS               |
|              |                                                | NM_006180.5:c.1345G>A p.(Val449Ile)        | 1  |      |                   |
|              |                                                | NM_006180.5:c.809A>G p.(Asn270Ser)         | 1  |      |                   |
| <i>PCNT</i>  | Pericentrin                                    | NM_006031.6:c.362_363del p.(Thr121Serfs*3) | 1  | Het. | Likely pathogenic |
|              |                                                | NM_006031.6:c.4090G>T p.(Glu1364*)         | 1  |      |                   |
|              |                                                | NM_006031.6:c.2347dup p.(Gln783Profs*8)    | 2  |      |                   |
| <i>PCSK1</i> | Proprotein convertase subtilisin kexin type 1  | NM_000439.5:c.661A>G p.(Asn221Asp)         | 13 | Het. | VUS               |
|              |                                                | NM_000439.5:c.2129C>G p.(Pro710Arg)        | 1  |      |                   |
|              |                                                | NM_000439.5:c.1096A>G p.(Thr366Ala)        | 1  |      |                   |
|              |                                                | NM_000439.5:c.1030G>A p.(Ala344Thr)        | 1  |      |                   |
|              |                                                | NM_000439.5:c.375G>A p.(Met125Ile)         | 2  |      |                   |
|              |                                                | NM_000439.4:c.1918A>G p.(Thr640Ala)        | 3  |      |                   |
| <i>PHIP</i>  | Pleckstrin homology domain interacting protein | NM_017934.7:c.3670C>G p.(Leu1224Val)       | 1  | Het. | VUS               |
|              |                                                | NM_017934.7:c.2579G>A p.(Gly860Glu)        | 1  |      |                   |

|               |           |                                         |   |      |     |
|---------------|-----------|-----------------------------------------|---|------|-----|
|               |           | NM_017934.7:c.3628A>G<br>p.(Lys1210Glu) | 1 |      |     |
| <i>PLXNA1</i> | Plexin A1 | NM_032242.4:c.989T>C<br>p.(Leu330Pro)   | 1 | Het. | VUS |
|               |           | NM_032242.4:c.1309G>C<br>p.(Val437Leu)  | 1 |      |     |
|               |           | NM_032242.4:c.211A>G<br>p.(Ile71Val)    | 1 |      |     |
| <i>PLXNA2</i> | Plexin A2 | NM_025179.4:c.973G>A<br>p.(Ala325Thr)   | 1 | Het. | VUS |
|               |           | NM_025179.4:c.5243G>T<br>p.(Trp1748Leu) | 1 |      |     |
|               |           | NM_025179.4:c.5503G>A<br>p.(Glu1835Lys) | 1 |      |     |
|               |           | NM_025179.4:c.2983G>A<br>p.(Glu995Lys)  | 2 |      |     |
|               |           | NM_025179.4:c.95C>G<br>p.(Ala32Gly)     | 1 |      |     |
|               |           | NM_025179.4:c.1423G>T<br>p.(Val475Leu)  | 1 |      |     |
|               |           | NM_025179.4:c.5251G>A<br>p.(Val1751Met) | 1 |      |     |
| <i>PLXNA3</i> | Plexin A3 | NM_017514.5:c.139G>A<br>p.(Val47Met)    | 1 | Het. | VUS |
|               |           | NM_017514.5:c.1048C>T<br>p.(Arg350Trp)  | 1 |      |     |
|               |           | NM_017514.5:c.1423A>G<br>p.(Ile475Val)  | 1 |      |     |
| <i>PLXNA4</i> | Plexin A4 | NM_020911.1:c.1259G>T<br>p.(Arg420Leu)  | 1 | Het. | VUS |
|               |           | NM_020911.2:c.299T>A<br>p.(Ile100Asn)   | 1 |      |     |
|               |           | NM_020911.1:c.4903C>T<br>p.(Arg1635Cys) | 1 |      |     |
|               |           | NM_020911.2:c.3492+3G<br>>A p.?         | 1 |      |     |
|               |           | NM_020911.2:c.1570G>A<br>p.(Asp524Asn)  | 1 |      |     |

|                 |                                                   |                                               |   |      |                   |
|-----------------|---------------------------------------------------|-----------------------------------------------|---|------|-------------------|
| <i>POMC</i>     | Proopiomelanocortin                               | NM_001035256.2:c.706C>G p.(Arg236Gly)         | 5 | Het. | Likely pathogenic |
|                 |                                                   | NM_001035256.2:c.394C>G p. (Pro132Ala)        | 3 |      | VUS               |
| <i>PROK2</i>    | Prokineticin 2                                    | c.(222+1_223-1)_(*1_?)del                     | 1 | Het. | VUS               |
|                 |                                                   | NM_001126128.2:c.297dup p p.(Gly100Trpfs*22)  | 1 |      |                   |
| <i>RAI1</i>     | Retinoic Acid Induced 1                           | NM_030665.4:c.867_872dup p.(Gln290_Gln291dup) | 1 | Het. | VUS               |
|                 |                                                   | NM_030665.4:c.194C>T p.(Thr65Met)             | 1 |      |                   |
|                 |                                                   | NM_030665.4:c.864_872dup p.(Gln289_Gln291dup) | 1 |      |                   |
|                 |                                                   | NM_030665.4:c.4996C>G p.(Leu1666Val)          | 1 |      |                   |
| <i>RPGRIP1L</i> | RPGRIP1 like                                      | NM_015272.5:c.2200C>T p.(Arg734*)             | 1 | Het. | Likely pathogenic |
|                 |                                                   | NM_015272.5:c.1489G>T p.(Glu497*)             | 1 |      |                   |
| <i>RPS6KA3</i>  | Ribosomal protein S6 kinase A3                    | c.(774+1_775-1)_ (1102+1_1103-1)del           | 1 | Het. | Likely pathogenic |
| <i>SDCCAG8</i>  | SHH signalling and ciliogenesis regulator SDCCAG8 | NM_006642.5:c.696T>G p.(Tyr232*)              | 1 | Het. | Likely pathogenic |
| <i>SEMA3A</i>   | Semaphorin 3A                                     | NM_006080.3:c.1799A>T p.(Lys600Met)           | 1 | Het. | VUS               |
|                 |                                                   | NM_006080.3:c.458A>G p.(Asn153Ser)            | 1 |      |                   |
| <i>SEMA3B</i>   | Semaphorin 3B                                     | NM_004636.2:c.1860G>C p.(Glu620Asp)           | 1 | Het. | VUS               |
|                 |                                                   | NM_004636.2:c.586C>T p.(Arg196*)              | 1 |      |                   |
| <i>SEMA3C</i>   | Semaphorin 3C                                     | NM_006379.5:c.857C>T p.(Ala286Val)            | 1 | Het. | VUS               |
| <i>SEMA3D</i>   | Semaphorin 3D                                     | NM_152754.3:c.113T>C p.(Leu38Ser)             | 1 | Het. | VUS               |

|                    |                                                 |                                                  |   |      |     |
|--------------------|-------------------------------------------------|--------------------------------------------------|---|------|-----|
| <i>SEMA3<br/>E</i> | Semaphorin 3E                                   | NM_012431.3:<br>c.283T>Gp.(Trp95Gly)             | 1 | Het. | VUS |
|                    |                                                 | NM_012431.3:c.214G>T<br>p.(Val72Leu)             | 1 |      |     |
|                    |                                                 | NM_012431.3:c.(115+1_1<br>16-1)_(336+1_337-1)del | 1 |      |     |
|                    |                                                 | NM_012431.3:c.1514T>C<br>p.(Ile505Thr)           | 1 |      |     |
| <i>SEMA3<br/>F</i> | Semaphorin 3F                                   | NM_004186.5:c.533C>T<br>p.(Pro178Leu)            | 1 | Het. | VUS |
|                    |                                                 | NM_004186.5:c.1352G>A<br>p.(Arg451Gln)           | 1 |      |     |
|                    |                                                 | NM_004186.5:c.1588-<br>3C>T p.?                  | 1 |      |     |
| <i>SEMA3<br/>G</i> | Semaphorin 3G                                   | NM_020163.3:c.200G>A<br>p.(Arg67Gln)             | 1 | Het. | VUS |
|                    |                                                 | NM_020163.3:c.1574dup<br>p.(Tyr525*)             | 1 |      |     |
| <i>SH2B1</i>       | SH2B adaptor<br>protein 1                       | NM_001145795.2:c.2083<br>G>A p.(Val695Met)       | 1 | Het. | VUS |
| <i>SIM1</i>        | Single-minded<br>homolog 1                      | NM_005068.3:c.390G>A<br>p.(Pro130=)              | 2 | Het. | VUS |
|                    |                                                 | NM_005068.3:c.1720A>G<br>p.(Met574Val)           | 1 |      |     |
|                    |                                                 | NM_005068.3:c.2135C>T<br>p.(Thr712Ile)           | 1 |      |     |
|                    |                                                 | NM_005068.3:c.452T>G<br>p.(Val151Gly)            | 1 |      |     |
|                    |                                                 | NM_005068.3:c.383T>C<br>p.(Ile128Thr)            | 1 |      |     |
|                    |                                                 | NM_005068.3:c.1445C>G<br>p.(Pro482Arg)           | 2 |      |     |
| <i>TRPC5</i>       | Transient<br>receptor<br>potential<br>channel 5 | NM_012471.3:c.2212C>A<br>p.(Leu738Ile)           | 3 | Het. | VUS |
| <i>UCP3</i>        | Uncoupling<br>protein 3                         | NM_003356.4:c.370T>A<br>p.(Cys124Ser)            | 1 | Het. | VUS |

|               |                                             |                                                         |   |      |                      |
|---------------|---------------------------------------------|---------------------------------------------------------|---|------|----------------------|
|               |                                             | NM_003356.4:c.304G>A                                    | 1 |      |                      |
|               |                                             | p.(Val102Ile)                                           |   |      |                      |
|               |                                             | NM_003356.4:c.88G>A                                     | 1 |      |                      |
|               |                                             | p.(Val30Ile)                                            |   |      |                      |
| <i>VPS13B</i> | Vacuolar<br>protein sorting<br>13 homolog B | NM_017890.4:c.11695_11<br>698del<br>p.(Ser3901Argfs*40) | 1 | Het. | Likely<br>pathogenic |
|               |                                             | NM_017890.4:c.8172+1G<br>>A p.?                         | 1 |      |                      |

HGVS/ISCN: Human Genome Variation Society/International System for human Cytogenetic Nomenclature; ACMG: American College of Medical Genetics and Genomics; VUS: variant of uncertain significance; Het: heterozygous; Hem: hemizygous.



**Table S3.** The prevalence of each genetic variant of uncertain significance among the positive cases.

| <b>Gene</b>      | <b>Zygoty</b> | <b>Number detected</b> | <b>Percentage (%)</b> |
|------------------|---------------|------------------------|-----------------------|
| <i>AFF4</i>      | Het.          | 1                      | 0.7                   |
| <i>ARMC5</i>     | Het.          | 1                      | 0.7                   |
| <i>BBS7</i>      | Het.          | 4                      | 2.8                   |
| <i>CEP290</i>    | Het.          | 1                      | 0.7                   |
| <i>CREBBP</i>    | Het.          | 2                      | 1.4                   |
| <i>CUL4B</i>     | Hem.          | 1                      | 0.7                   |
| <i>DNMT3A</i>    | Het.          | 2                      | 1.4                   |
| <i>DYRK1B</i>    | Het.          | 1                      | 0.7                   |
| <i>EP300</i>     | Het.          | 4                      | 2.8                   |
| <i>KIDINS220</i> | Het.          | 3                      | 2.1                   |
| <i>MAGEL2</i>    | Het.          | 4                      | 2.8                   |
| <i>MC3R</i>      | Het.          | 2                      | 1.4                   |
| <i>MC4R</i>      | Het.          | 2                      | 1.4                   |
| <i>MECP2</i>     | Het.          | 1                      | 0.7                   |
|                  | Hem.          | 1                      | 0.7                   |
| <i>MRAP2</i>     | Het.          | 1                      | 0.7                   |
| <i>NCOA1</i>     | Het.          | 1                      | 0.7                   |

|               |      |    |      |
|---------------|------|----|------|
| <i>NRP1</i>   | Het. | 1  | 0.7  |
| <i>NRP2</i>   | Het. | 1  | 0.7  |
| <i>NTRK2</i>  | Het. | 3  | 2.1  |
| <i>PCSK1</i>  | Het. | 21 | 14.9 |
| <i>PHIP</i>   | Het. | 3  | 2.1  |
| <i>PLXNA1</i> | Het. | 3  | 2.1  |
| <i>PLXNA2</i> | Het. | 8  | 5.7  |
| <i>PLXNA3</i> | Het. | 3  | 2.1  |
| <i>PLXNA4</i> | Het. | 5  | 3.5  |
| <i>POMC</i>   | Het. | 3  | 2.1  |
| <i>PROK2</i>  | Het. | 2  | 1.4  |
| <i>RAI1</i>   | Het. | 4  | 2.8  |
| <i>SEMA3A</i> | Het. | 2  | 1.4  |
| <i>SEMA3B</i> | Het. | 2  | 1.4  |
| <i>SEMA3C</i> | Het. | 1  | 0.7  |
| <i>SEMA3D</i> | Het. | 1  | 0.7  |
| <i>SEMA3E</i> | Het. | 4  | 2.8  |
| <i>SEMA3F</i> | Het. | 3  | 2.1  |
| <i>SEMA3G</i> | Het. | 2  | 1.4  |

|                                     |      |   |     |
|-------------------------------------|------|---|-----|
| <i>SH2B1</i>                        | Het. | 1 | 0.7 |
| <i>SIM1</i>                         | Het. | 8 | 5.7 |
| <i>TRPC5</i>                        | Het. | 3 | 2.1 |
| <i>UCP3</i>                         | Het. | 3 | 2.1 |
| Het: heterozygous; Hem: hemizygous. |      |   |     |
